# Supplementary material for: Effect of oxygen vacancies and crystal phases in defective Pt/ZrO2−x on its photocatalytic activity toward hydrogen production
Source: Royal Society of Chemistry journal article supplement (doi:10.1039/d3cy01470c), 2023-12-06
Supplement: d3cy01470c1.pdf [file d3cy01470c1.pdf]

## Supporting Information

# Effect of oxygen vacancies and crystal phases in defective Pt/ZrO<sub>2-x</sub> on its photocatalytic activity toward hydrogen production

*Yukari Yamazaki, <sup>a</sup> Naoto Doshita, <sup>a</sup> Kohsuke Mori, <sup>ab</sup> Yasutaka Kuwahara, <sup>ab</sup> Hisayoshi Kobayashi, <sup>c</sup> and Hiromi Yamashita\*<sup>ab</sup>*

<sup>a</sup> Division of Materials and Manufacturing Science, Graduate School of Engineering,

Osaka University, 2-1 Yamada-oka, Osaka 565-0871, Japan

<sup>b</sup> Innovative Catalysis Science Division, Institute for Open and Transdisciplinary Research Initiatives (ICS-OTRI), Osaka University, Suita, Osaka 565-0871, Japan.

<sup>c</sup> Kyoto Institute of Technology, Matsugasaki, Sakyo-ku, Kyoto 606-8585, Japan

**Table S1.** Lattice parameters of the models for DFT calculation.

| system                   | $a$    | $b$    | $c$     | $\alpha$ | $\beta$ | $\gamma$ |
|--------------------------|--------|--------|---------|----------|---------|----------|
| Monoclinic<br>(111) slab | 7.3207 | 7.4378 | 15.2518 | 90       | 90      | 114.68   |
| Tetragonal<br>(101) slab | 6.4049 | 3.6400 | 19.9195 | 90       | 90      | 90       |

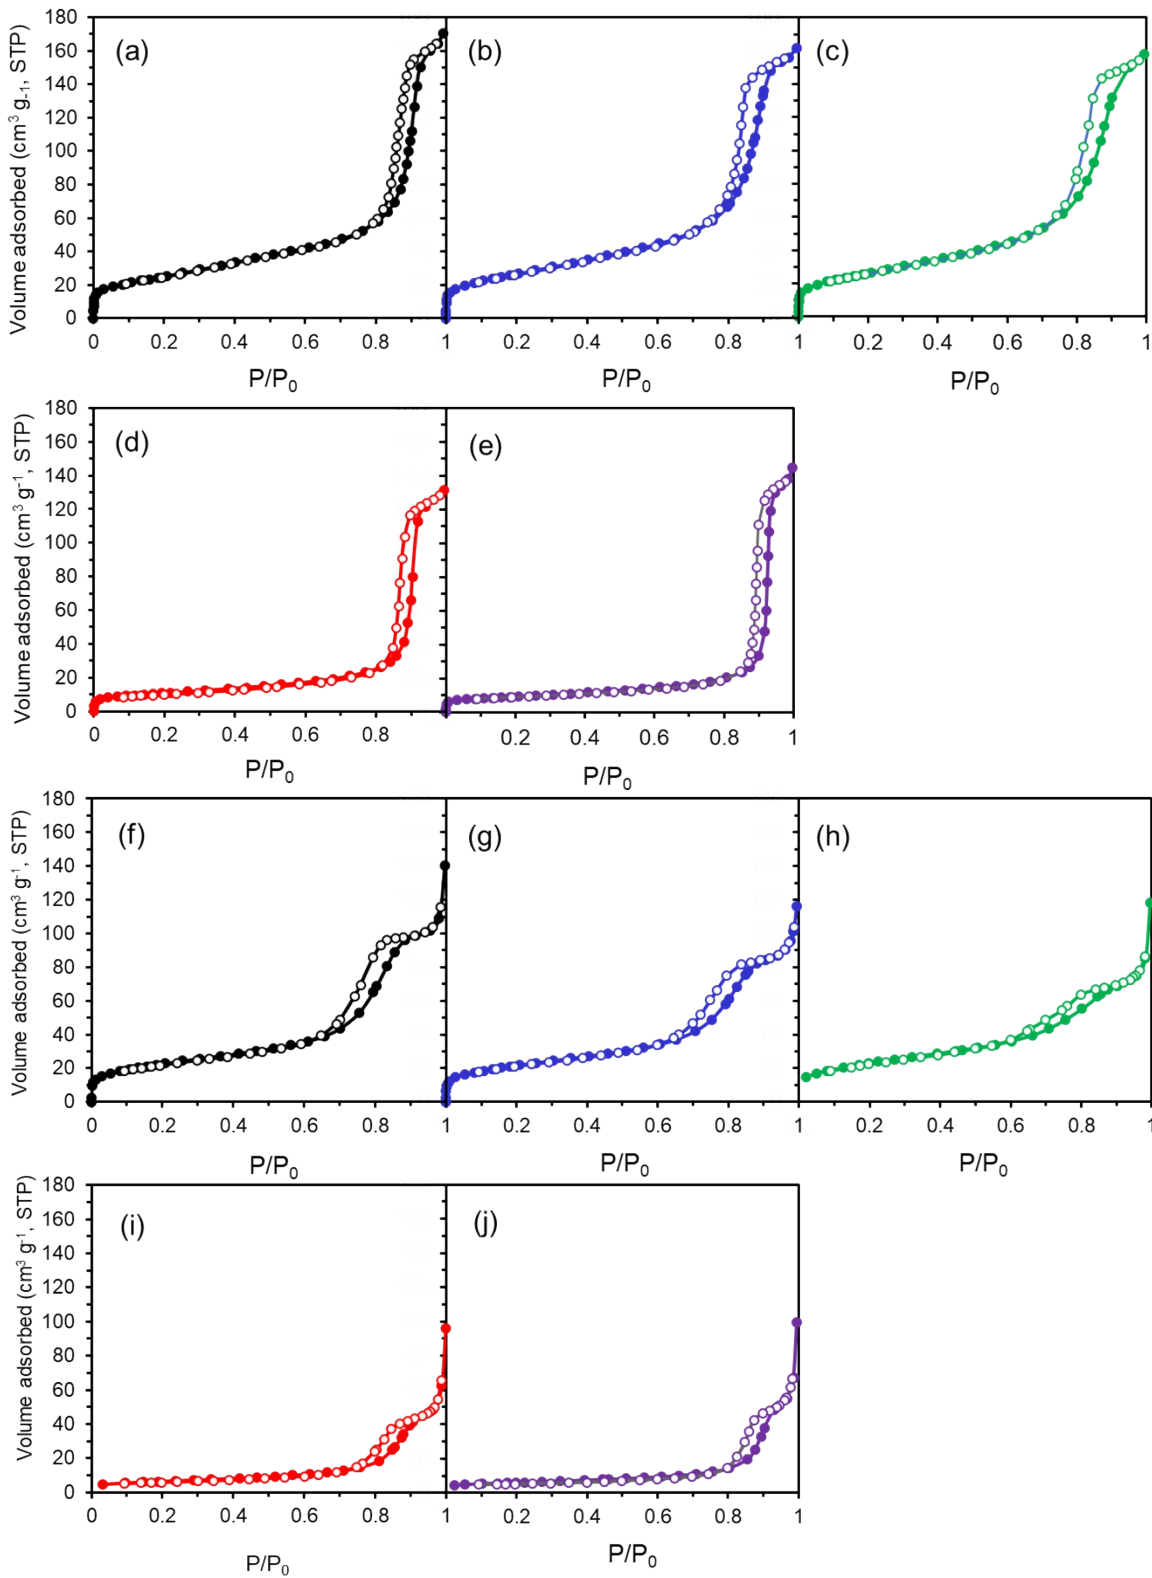

**Figure S1.**  $N_2$  adsorption/desorption isotherms of (a) as-synthesized  $m$ - $ZrO_2$ , (b)  $Pt/m$ - $ZrO_{2-x}200$ , (c)  $Pt/m$ - $ZrO_{2-x}400$ , (d)  $Pt/m$ - $ZrO_{2-x}600$ , (e)  $Pt/m$ - $ZrO_{2-x}600_6h$ , (f) as-synthe

sized  $t$ - $ZrO_2$ , (g)  $Pt/t$ - $ZrO_{2-x}200$ , (h)  $Pt/t$ - $ZrO_{2-x}400$ , (i)  $Pt/t$ - $ZrO_{2-x}600$ , and (j)  $Pt/t$ - $ZrO_{2-x}600_6h$ .

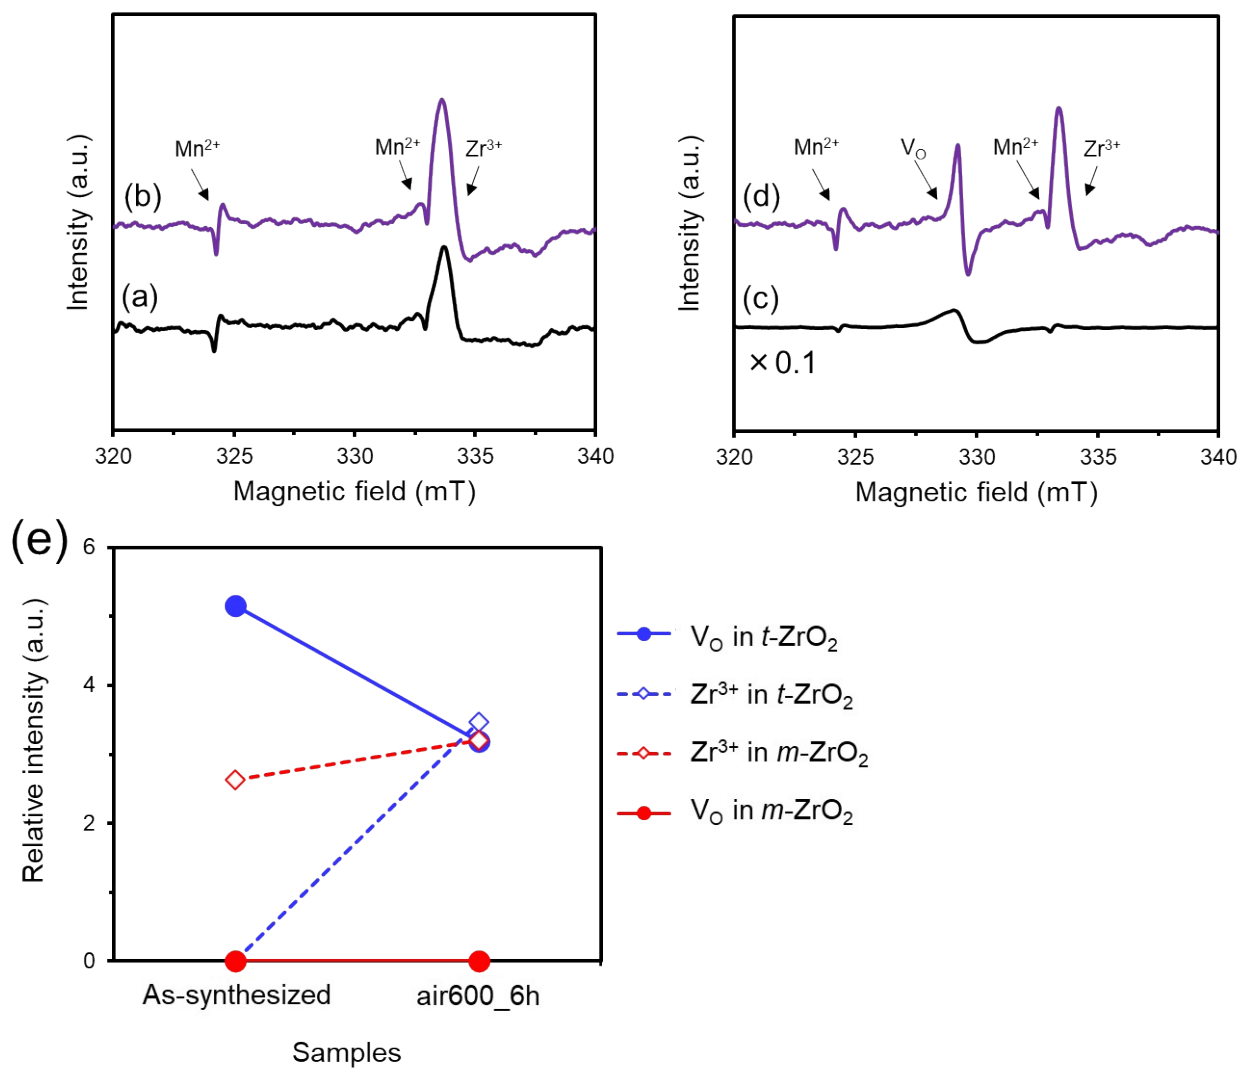

**Figure S2.** ESR spectra of (a) as-synthesized *m*-ZrO<sub>2</sub>, (b) *m*-ZrO<sub>2</sub> after calcination, (c) as-synthesized *t*-ZrO<sub>2</sub>, and (d) *t*-ZrO<sub>2</sub> after calcination at 600 °C for 6 h. (e) Relative intensity of the ESR signals based on Mn<sup>2+</sup>.

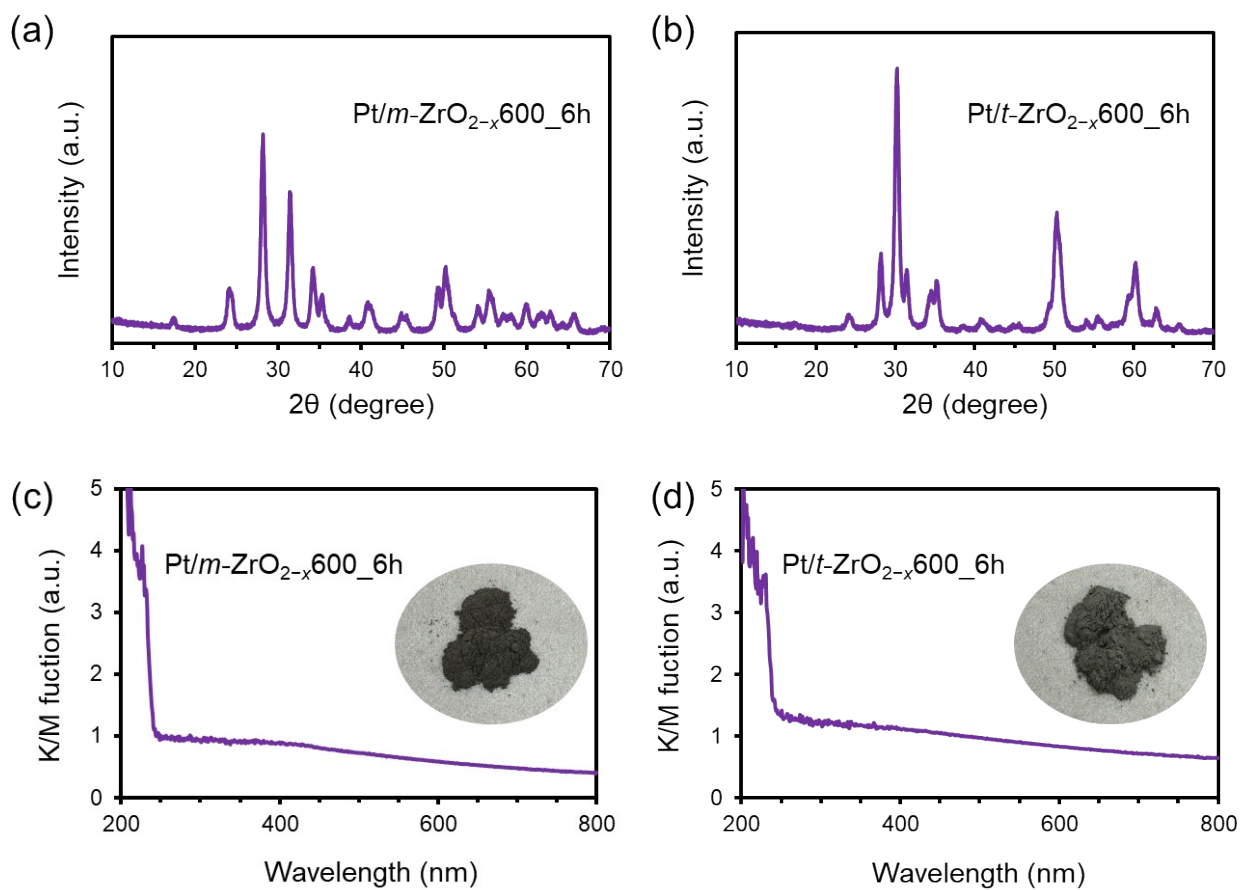

**Figure S3.** XRD patterns of (a) Pt/m-ZrO<sub>2-x</sub>600\_6h and (b) Pt/t-ZrO<sub>2-x</sub>600\_6h. Diffuse-reflectance spectra and photographs of (c) Pt/m-ZrO<sub>2-x</sub>600\_6h and (d) Pt/t-ZrO<sub>2-x</sub>600\_6h.

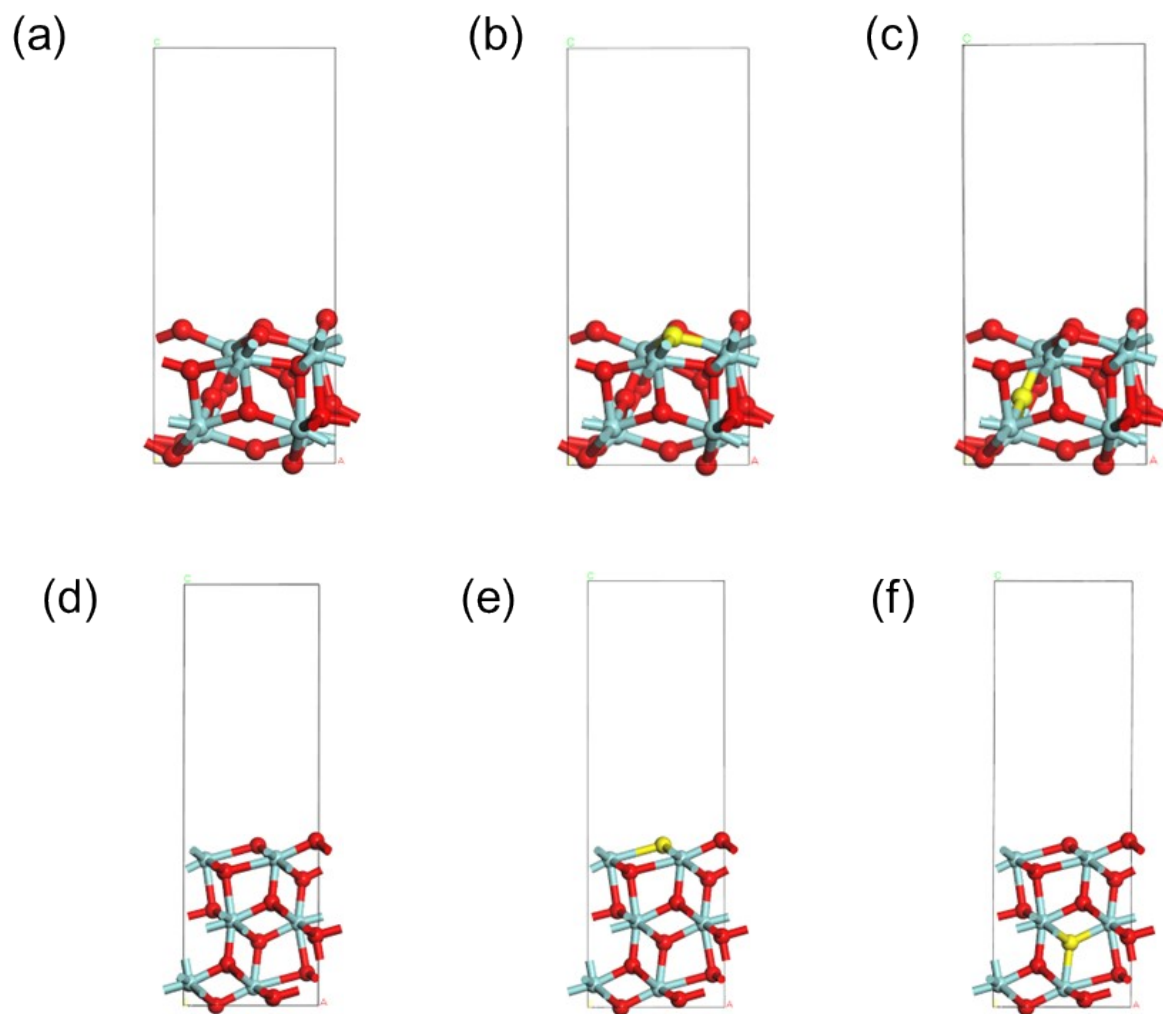

**Figure S4.** Models of monoclinic ZrO<sub>2</sub> (111) with (a) no defect, (b) a surface V<sub>O</sub>, (c) a bulk V<sub>O</sub>, and tetragonal ZrO<sub>2</sub> (101) with (d) no defect, (e) a surface V<sub>O</sub>, (f) a bulk V<sub>O</sub>. Red and blue balls display O and Zr atom, respectively. Yellow balls are O atoms removed to form V<sub>O</sub> prior to the calculation.
